1 **Volumetric Analysis of Acute Uncomplicated Type B Aortic Dissection Using an**  
2 **Automated Deep Learning Aortic Zone Segmentation Model**

3  
4 Jonathan R. Krebs MD<sup>a</sup>, Muhammad Imran PhD<sup>b</sup>, Brian Fazzone MD<sup>a</sup>, Chelsea Viscardi MD<sup>a</sup>,  
5 Benjamin Berwick MD<sup>c</sup>, Griffin Stinson BS<sup>a</sup>, Evans Heithaus MD<sup>c</sup>, Gilbert R. Upchurch, Jr.  
6 MD<sup>a</sup>, Wei Shao PhD<sup>b</sup>, Michol A. Cooper MD, PhD<sup>a</sup>

7  
8 <sup>a</sup>Department of Surgery, Division of Vascular Surgery, University of Florida, Gainesville, FL

9 <sup>b</sup>Department of Medicine, University of Florida, Gainesville, FL

10 <sup>c</sup>Department of Radiology, University of Florida, Gainesville, FL

11

12 Please address correspondence to:

13 Michol Cooper, MD, PhD

14 Department of Surgery, Division of Vascular Surgery and Endovascular Therapy

15 University of Florida College of Medicine

16 1600 SW Archer Rd NG-45, PO Box 100128

17 Gainesville, FL 32610-0128

18 [Michol.cooper@surgery.ufl.edu](mailto:Michol.cooper@surgery.ufl.edu)

19

20 Financial support: No funding was provided for the present work.

21

22 Presented at the Plenary Session at the Forty-eighth Annual Meeting of the Southern Association  
23 for Vascular Surgery, Scottsdale, AZ January 24-27, 2024

1 **ARTICLE HIGHLIGHTS**

2 **Type of Research:** Single-center retrospective cohort study

3 **Key Findings:** A deep learning model was developed to analyze volumetric growth in patients  
4 with medically managed acute uncomplicated type B aortic dissection. Volumetric growth was  
5 most pronounced in zones 5 (24%), 4 (13%), and 3 (11%). Model performance was best in zones  
6 4, 5, and 9.

7 **Take Home Message:** A trained, automated, open-source aortic zone segmentation model can  
8 accurately track changes in aortic growth by zone over time, providing framework for further  
9 clinical applications.

10 **Table of Contents Summary:** A trained, automated model was developed to analyze aortic zone  
11 volumetric growth in a retrospective study of 59 patients with medically managed acute  
12 uncomplicated TBAD. Volumetric growth was most pronounced in zones 3-5, while model  
13 performance was best in zones 4,5, and 9.

14

15

16

17

18

19

20

1 **Introduction:**

2 Machine learning techniques have shown excellent performance in 3D medical image analysis,  
3 but have not been applied to acute uncomplicated type B aortic dissection (auTBAD) utilizing  
4 SVS/STS-defined aortic zones. The purpose of this study was to establish a trained, automatic  
5 machine learning aortic zone segmentation model to facilitate performance of an aortic zone  
6 volumetric comparison between auTBAD patients based on rate of aortic growth.

7 **Methods:**

8 Patients with auTBAD and serial imaging were identified. For each patient, imaging  
9 characteristics from two CT scans were analyzed: (1) the baseline CTA at index admission, and  
10 (2) either the most recent surveillance CTA, or the most recent CTA prior to an aortic  
11 intervention. Patients were stratified into two comparative groups based on aortic growth: rapid  
12 growth (diameter increase  $\geq 5$ mm/year) and no/slow growth (diameter increase  $< 5$ mm/year).  
13 Deidentified images were imported into an open-source software package for medical image  
14 analysis and randomly partitioned into training(80%), validation(10%), and testing(10%) cohorts.  
15 Training datasets were manually segmented based on SVS/STS criteria. A custom segmentation  
16 framework was used to generate the predicted segmentation output and aortic zone volumes.

17 **Results:**

18 Of 59 patients identified for inclusion, rapid growth was observed in 33 (56%) patients and  
19 no/slow growth was observed in 26 (44%) patients. There were no differences in baseline  
20 demographics, comorbidities, admission mean arterial pressure, number of discharge  
21 antihypertensives, or high-risk imaging characteristics between groups ( $p > 0.05$  for all). Median  
22 duration between baseline and interval CT was 1.07 years (IQR 0.38-2.57). Post-discharge aortic

1 intervention was performed in 13 (22%) of patients at a mean of  $1.5 \pm 1.2$  years, with no  
2 difference between groups ( $p > 0.05$ ). In both groups, all zones of the thoracic and abdominal  
3 aorta increased in volume over time, with the largest relative increase in Zone 5 with a median  
4 24% increase (IQR 4.4-37). Baseline zone 3 volumes were larger in the no/slow growth ( $6v^3$ )  
5 than the rapid growth group ( $5v^3$ ) ( $p = 0.03$ ). There were no other differences in baseline zone  
6 volumes between groups ( $p > 0.05$  for all). Dice coefficient, a performance measure of the model  
7 output, was 0.73. Performance was best in Zones 4 (0.82), 5(0.88), and 9(0.91).

## 8 **Conclusions:**

9 To our knowledge this is the first description of an automatic deep learning segmentation model  
10 incorporating SVS-defined aortic zones. The open-source, trained model demonstrates high  
11 concordance to the manually segmented aortas with the strongest performance in zones 4, 5, and  
12 9, providing a framework for further clinical applications. In our limited sample, there were no  
13 differences in baseline aortic zone volumes between rapid growth and no/slow growth patients.

14

15

16

17

18

1 **Background:**

2 Despite 20 years of international clinical trials and evaluation, there is no clear data to guide the  
3 optimal treatment for patients presenting with acute uncomplicated type B aortic dissection  
4 (aTBAD). Traditional management with anti-hypertensive therapy and imaging surveillance  
5 results in acceptable early outcomes but long-term survival is poor and aortic degeneration  
6 mandating intervention occurs in 40-60% of patients.<sup>1,2</sup> Thoracic endovascular aortic repair  
7 (TEVAR) in the subacute period has emerged as a viable alternative that may improve aortic  
8 remodeling and decrease TBAD-related mortality, but carries an increased risk of procedural  
9 complications, higher cost, and risk of overtreatment.<sup>3,4</sup>

10 Due to the clinical equipoise between these two treatment modalities, a qualitative assessment of  
11 dissection morphology often drives the initial decision to perform TEVAR in the acute/subacute  
12 period. While several high-risk radiographic parameters have been suggested including false  
13 lumen diameter >22mm, presence of a lesser curve entry tear, and radiographic malperfusion,  
14 aortic diameter >40mm is the only prospectively validated high-risk feature predicting need for  
15 future intervention.<sup>5-9</sup> Additionally, although diameter measurements are the gold standard used  
16 to evaluate aortic growth over time, they are subject to high inter-reader variability and do not  
17 capture the three-dimensional (3D) nature of aortic growth.<sup>10</sup> Volumetric CT angiography (CTA)  
18 has been suggested as a means of overcoming the limitations of diameter-based measurements  
19 and may be better suited to track 3D aortic growth over time.<sup>11,12</sup> Deep learning techniques have  
20 been applied to 3D medical image analysis, with particularly strong performance demonstrated  
21 in the computer-aided detection of abnormal mammograms and the identification of lung  
22 nodules, for example.<sup>13-16</sup> In aortic disease, deep learning techniques have been used to model  
23 aortic dissections, but none have used the output to examine changes in total aortic growth over

1 time.<sup>17</sup> In addition, no prior studies have examined volumetric growth patterns across aortic  
2 zones defined by Society for Vascular Surgery (SVS) and Society of Thoracic Surgeons (STS)  
3 reporting guidelines, which may demonstrate distinct behavior after dissection (**Figure 1**).<sup>9</sup>The  
4 purpose of this study was to establish a trained, automated deep learning aortic zone  
5 segmentation model to facilitate performance of a volumetric analysis of patients with medically  
6 managed aTBAD. A secondary objective was to determine if differences in baseline aortic zone  
7 volumes were associated with aortic growth rate over time. We hypothesized that baseline  
8 thoracic aortic volumes would be higher in patients that experienced aortic growth over time  
9 compared to those that did not.

## 10 **Methods:**

11 *Patient identification:* The study was approved with a waiver of consent from our Institutional  
12 Review Board (IRB 202100962). Using a prospectively maintained institutional database, a  
13 retrospective review of patients admitted to our center with a diagnosis of code of aortic  
14 dissection (ICD-9 codes 441.01, 441.03; ICD-10 codes I71.00, I71.01) between 10/2011 and  
15 3/2020 was performed. Type A dissection, intramural hematoma, penetrating aortic ulcer, and  
16 chronic aortic dissection patients were excluded. TBAD patients that underwent TEVAR on their  
17 index admission were excluded. Uncomplicated TBAD patients were identified based on the  
18 absence of malperfusion, rupture, rapid degeneration, or refractory pain. All uncomplicated  
19 TBAD patients were medically managed without surgical intervention at index admission.  
20 Imaging was then reviewed and patients without high-resolution surveillance imaging beyond  
21 three months from discharge after index hospitalization were excluded. Patients were reviewed to  
22 ensure high-resolution surveillance CTA ( $\leq 3$ mm slices) at both diagnosis and surveillance. Given  
23 that many initial CTAs were sourced from various local imaging centers with differing protocols,

1 our study's criteria mandated that images were captured in  $\leq 3$ mm slices. Mean number of axial  
2 slices was 734, with mean slice thickness 0.969 mm. To optimize our 3D training model, patients  
3 with bovine arch or aberrant arch anatomy were excluded.

4 *Data collection:* Patient demographics, comorbidities, and hospital course were obtained from  
5 the electronic medical record. A radiologist and vascular surgeon analyzed imaging  
6 characteristics from two CT scans: the baseline CTA at index admission, and either the most  
7 recent surveillance CTA, or the most recent CTA prior to an aortic intervention if one was  
8 performed. Imaging characteristics including total aortic diameter, true and false lumen diameter,  
9 and high-risk features including presence of lesser curve entry tear and thrombosis status of the  
10 false lumen were all assessed. Patients were then stratified into two groups based on maximum  
11 aortic diameter changes over time: rapid growth (diameter increase  $\geq 5$ mm/year and no/slow  
12 growth (diameter increase  $< 5$ mm/year).

13 *Model Implementation:*

14 CT scans were randomly partitioned into training (80%), validation (10%), and testing (10%)  
15 cohorts for unbiased evaluation. Our training pipeline was implemented using the PyTorch  
16 framework and MONAI library.<sup>18</sup> To expedite model training, we re-sampled volumes to a  
17 uniform spacing and employed a random cropping center to re-sample random patches for  
18 training, enhancing data diversity and mitigating overfitting. Our model was trained for 3000  
19 iterations, roughly equivalent to 666 epochs. Training was performed on a single NVIDIA A100  
20 GPU with 80 GB RAM.

21 *Manual Segmentation:* Baseline and surveillance CTAs were deidentified and exported from our  
22 institutional software platform and uploaded to 3D Slicer (<https://www.slicer.org>), a free open-

1 source software package for medical image analysis.<sup>19</sup> After importing the deidentified images  
2 into 3D Slicer, the 11 aortic zones were manually segmented based on SVS/STS criteria. A  
3 Gaussian smoothing filter was applied to reduce jaggedness and enhance 3D continuity.

#### 4 *Segmentation Model:*

5 A custom Context Infused Swin-UNet (CIS-UNet) segmentation framework was used for multi-  
6 class 3D aortic segmentation (**Figure 2**).<sup>20</sup> CIS-UNet integrates the capabilities of convolutional  
7 neural networks (CNNs) and the Swin transformer to effectively capture both local and global  
8 features. CIS-UNet consists of a CNN encoder block architecture, a Swin transformer in the  
9 bottleneck layer, and a decoder using transposed CNNs.<sup>20</sup> CIS-UNet features a novel self-  
10 attention block to efficiently capture long range dependencies between image patches. In aortic  
11 branch segmentation, CIS-UNet has been shown to outperform state-of-the-art segmentation  
12 models.<sup>20</sup> Using the 3D output generated, the volume in voxels cubed of each aortic zone was  
13 computed using the segment statistics function within 3D Slicer.

14 *Statistical Analysis:* Model performance was assessed by mean Dice coefficient. Primary  
15 comparisons were made of the volumes in the different aortic zones between patients with rapid  
16 and no/slow aortic growth using R statistical package. Group comparisons were made using t-  
17 test/Man-Whitney test and Chi-square/Fisher Exact test as appropriate with a p-value of  $\leq 0.05$   
18 considered significant. In addition, percentage increase in zone and whole aorta volume per year  
19  $((\text{final volume} - \text{initial volume}) / (\text{initial volume}) * 100 / \text{surveillance duration})$  was plotted by patient  
20 using Prism 10 software (GraphPad, La Jolla, CA, USA).

#### 21 **Results:**



1 Of the 159 patients treated for uncomplicated TBAD, 76 patients had the requisite surveillance  
2 imaging for inclusion. An additional 17 patients were excluded due to aberrant aortic arch  
3 anatomy (**Figure 3**). Patient characteristics are shown in **Table I**. Of 59 included patients,  
4 average age was 59.2 years and 66% were male. Initial mean arterial pressure (MAP) was 95.5  
5 mmHg. Hypertension was a listed diagnosis in 81% of patients, followed by any tobacco use  
6 history (68%) and renal disease (14%). Patients were discharged with an average of 3  
7 antihypertensive medications. Rapid aortic growth was observed in 33 (56%) patients, with  
8 no/slow aortic growth observed in 26 (44%) patients. There were no differences in baseline  
9 demographics, comorbidities, admission mean arterial pressure, or number of discharge  
10 antihypertensives between groups ( $p>0.05$  for all). Median duration between baseline and  
11 interval CT was 1.07 years (IQR 0.38-2.57); it was longer in those with no/slow aortic growth  
12 (median 2.2 years (IQR 1.2-4.0)) compared to those with rapid aortic growth (median 0.65 years  
13 (IQR 0.26-1.09)) ( $p<0.01$ ). Among all patients, thoracic aortic diameter increased at a median of  
14 4.9 (IQR 1.6-13.1) mm/year. In patients with rapid aortic growth, median annual growth was  
15 11.0 (IQR 5.8-20.9) mm/year, compared to an annual growth rate of 1.7 (IQR 0.1-3.8) mm/year  
16 in patients with no/slow aortic growth ( $p<0.01$ ). Post-discharge aortic intervention was  
17 performed in 13 (22%) of patients during the surveillance period at a mean of  $1.5\pm 1.2$  years, with  
18 no difference in incidence between patients with rapid aortic growth ( $n=7$ , 21%) and no/slow  
19 aortic growth ( $n=6$ , 23%) ( $p=1$ ).

20 *Baseline CT characteristics:* Baseline imaging characteristics are shown in **Table II**. Among all  
21 patients, baseline maximum thoracic aortic diameter was  $42.0\pm 7.0$  mm and baseline maximum  
22 abdominal aortic diameter was  $32.9\pm 5.0$  mm. Maximum thoracic aortic diameter was greater in  
23 patients with no/slow aortic growth  $<5$ mm/year ( $44.3\pm 8.5$  mm) compared to those with rapid

1 aortic growth ( $40.3 \pm 5.0$  mm) ( $p=0.03$ ). Abdominal aortic diameter was also greater in patients  
2 with no/slow aortic growth ( $34.3 \pm 5.7$ ) than those with rapid aortic growth ( $31.7 \pm 4.1$ ) ( $p=0.05$ ).  
3 There were no differences in false lumen patency, incidence of false lumen diameter  $>22$ mm, or  
4 incidence of lesser curve entry tear between groups ( $p>0.05$ ).

5 *Interval CT characteristics:* Interval imaging characteristics are shown in **Table II**. At the  
6 interval CT scan, mean thoracic aortic diameter was similar in the no/slow growth group  
7 ( $48.8 \pm 8.8$ ) compared to the rapid growth group ( $48.8 \pm 10.0$ ) ( $p=1.0$ ). There was no difference in  
8 abdominal aortic diameter between the no/slow growth group ( $36.7 \pm 6.7$ ) and the rapid growth  
9 group ( $38.7 \pm 7.6$ ) ( $p=0.27$ ). There remained no differences in false lumen patency or false lumen  
10 diameter  $>22$ mm between groups ( $p>0.05$ ).

11 *Volumetric Growth:* **Table III** shows percentage of aortic volume increase by aortic zone over  
12 time. All measured zones of the aorta increased in volume over time, with the largest relative  
13 increase in Zone 5 with a median 24% increase (IQR 4.4-37) during the surveillance duration.  
14 Representative model output is shown in **Figure 4**. Compared to patients with no/slow growth,  
15 patients with rapid growth had higher percentage growth in all zones with significant differences  
16 in zone 4 (26% IQR 11-106 vs 4.1% IQR -2.2-13,  $p<0.01$ ), zone 5 (32% IQR 18-60 vs 5.8% IQR  
17 0.69-24,  $p<0.01$ ), and zone 9 (15% IQR -0.14-45 vs 0.56% IQR -9.6-4.6,  $p=0.01$ ). **Figure 5**  
18 shows percentage growth over time by patient. While most patients experienced an increase in  
19 zone volume over time, there was significant variation by patient and by aortic zone.

20 *Baseline Zone Volume Comparison:* Mean aortic zone volumes obtained from baseline CTA are  
21 shown in **Table IV**. Mean zone 3 volume was greater in patients with no/slow aortic growth ( $6.0$   
22 voxels<sup>3</sup> SD 1.4), compared to patients with rapid growth ( $5.0$  voxels<sup>3</sup> SD 1.8) ( $p=0.03$ ). There  
23 were no other differences in baseline zone volumes between groups ( $p>0.05$  for all).

1 *Segmentation model:* The performance of the 3D-model is measured based on the number of  
2 overlapping pixels between the physician-annotated ground-truth (actual) region and the model  
3 predicted region. Performance is scored based on the Dice coefficient which ranges from 0 to 1  
4 with 1 indicating a perfect match. Dice coefficient was tested using random sample of the  
5 training dataset with an overall performance of 0.73. Performance was best in Zone 4 (0.82),  
6 Zone 5 (0.88), and Zone 9 (0.91), with worse performance in Zone 3 (0.54), Zone 6 (0.60), Zone  
7 7 (0.65), and Zone 8 (0.70). (**Table V**)

## 8 **Discussion:**

9 To our knowledge, this is the first description of an automatic deep learning aortic segmentation  
10 model incorporating society-defined aortic zones and trained using a real-world dataset of  
11 patients with acute uncomplicated TBAD. The open-source, trained model demonstrates  
12 excellent concordance to a manually segmented “ground truth” aorta with the strongest  
13 performance in zones 4, 5, and 9. The model was able to accurately track changes in aortic  
14 volume over time and by patient, although in contrast to our hypothesis there were no differences  
15 in baseline zone volumes between the rapid aortic growth and no/slow aortic growth groups. This  
16 model provides a framework to accurately follow aortic volumes over time, with long-term  
17 potential for applications in growth prediction models, diagnosis and treatment planning, and  
18 incorporation into personalized treatment algorithms for dissection patients.

19 In vascular surgery, 3D image reconstruction has long played a role in preoperative planning and  
20 device selection. Contemporary commercially available software designed to assist with  
21 operative planning offers accurate reconstruction but is costly, semi-automatic, and requires  
22 extensive training thereby limiting its utility.<sup>21</sup> For these reasons, machine learning, a subfield of  
23 artificial intelligence involving the development of algorithms capable of learning from data

1 without programmed instruction, has generated interest for use in aortic pathology. In the context  
2 of aortic dissection, several studies have applied machine learning techniques to 3D image  
3 analysis, largely for the purpose of clinical diagnosis. Both Feiger et al. and Harris et al.  
4 developed machine learning models for the segmentation and classification of aortic  
5 dissection.<sup>22-24</sup> Harris et al. demonstrated a sensitivity and specificity >94% for the diagnosis of  
6 aortic dissection based on a large sample of imaging studies obtained in a teleradiology practice,  
7 while the proposed model developed by Feiger et al. focused specifically on TBAD imaging and  
8 demonstrated high segmentation accuracy for identification of true lumen, false lumen, and total  
9 aorta.<sup>22,23</sup> Other groups have proposed models for the diagnosis of abdominal aortic aneurysm  
10 (AAA) with diagnostic accuracy of up to 99%.<sup>25-27</sup> These models collectively highlight the  
11 potential for machine learning applications in vascular surgery.

12 A similarity of these prior studies is that each model used CNN-based architecture. While a  
13 CNN-based approach is well suited for the task of solid organ segmentation or performing a  
14 binary operation like identifying the presence or absence of pathology, a CNN-based approach  
15 failed in our case when applied to the more complex task of aortic zone segmentation. In our  
16 dataset, initial attempts to perform aortic segmentation using existing CNN-based models  
17 resulted in object misidentification and over/under segmentation of multiple zones in nearly  
18 every patient.<sup>20</sup> The CIS-UNet model we developed for this study builds off of the CNN-based  
19 approach by incorporating a novel self-attention block and vision transformer, both of which  
20 serve to improve segmentation accuracy in the task of aortic zone segmentation. Still, the overall  
21 dice coefficient of 0.73 across all zones leaves room for improvement. It is worse than scores  
22 attained with other models applied to simpler segmentation tasks: using CNN-based architecture,  
23 Yu et al found mean dice coefficient scores exceeding 0.93 for aorta, true lumen, and false lumen

1 segmentation.<sup>24</sup> This highlights the added difficulty of incorporating aortic zones into a  
2 segmentation model and the opportunity for further refinement.

3 A principal application of this model is that it offers the opportunity to accurately follow aortic  
4 pathology in TBAD patients using automated zonal volumetric and diameter measurements.  
5 Since the publication of updated TBAD reporting standards, only one study has analyzed zone-  
6 based growth of medically-managed TBAD. Blakeslee-Carter et al analyzed center-line diameter  
7 changes in standardized locations within each aortic zone over time in a similar cohort of 76  
8 patients with medically managed acute/subacute TBAD.<sup>28</sup> In this study, diameter growth was  
9 most pronounced in zones 3 ( $4.8\pm 4.2$  mm/year), 4 ( $4.7\pm 4.4$  mm/year), and 5 ( $3.7\pm 3.5$  mm/year),  
10 in agreement with our volume-based assessment, where growth was most pronounced in zones 3-  
11 5.<sup>28</sup> This study showcases the potential application for a machine learning model like the one  
12 developed here to automate and expedite the task of taking manual measurements at specific  
13 locations within each aortic zone over time. Furthermore, the ability to generate both maximum  
14 diameter and volumetric data may allow for more robust growth analyses over time.

15 Another application of the proposed model is for the automation of TBAD classification.  
16 Previous models developed for aortic dissection or aneurysm have successfully performed the  
17 binary task of identifying the presence or absence of pathology, but have been unable to perform  
18 the more difficult task of differentiating between dissections based on a classification system,  
19 such as the Stanford, DeBakey, or SVS/STS reporting standard systems.<sup>9,23,29,30</sup> Rapid, automated  
20 determination of the dissection type could facilitate an accurate diagnosis and timely surgical  
21 consultation to the appropriate team, leading to life saving treatment. While efforts are ongoing  
22 to incorporate segmentation of the true and false lumens of the dissection into our current model,  
23 when added to the existing zone-based framework the model could provide a 3D assessment of

1 the dissection flap morphology along with its proper classification according to the extent of the  
2 dissection and the affected zones.

3 The ultimate goal is to incorporate the data generated from the model output into a growth  
4 prediction algorithm that can assist with the selection of the most appropriate management  
5 pathway for patients with acute TBAD. In AAA, machine learning models have outperformed  
6 logistic regression in models predicting disease prevalence and mortality after rupture, and been  
7 used to predict annual aortic growth to within 2mm at 85% accuracy.<sup>31-34</sup> Compared to AAA,  
8 TBAD may be an inherently more complex pathology than AAA to implement into a growth  
9 prediction algorithm due to variable patterns of dissection morphology and disease extent, and  
10 current understanding of high-risk radiographic parameters is limited. Conventional radiographic  
11 criteria defined as high risk in the literature, including aortic diameter >40mm, false lumen  
12 diameter >22mm, and lesser curve entry tear are based on small retrospective analyses and have  
13 not been prospectively validated.<sup>9</sup> The automated model we propose offers the capability to  
14 readily attain these discrete measurements at a granular level. While our initial hypothesis that  
15 baseline zone volumes would be associated with aortic growth over time was unfounded, we  
16 were limited by the small number of patients available for analysis. It is worth noting that when  
17 looking at other conventional high-risk features, there were also no differences between groups,  
18 which speaks to the limitations of our sample size and the need for further testing and model  
19 optimization.

## 20 *Limitations*

21 There are several other important limitations to consider. We excluded patients with aberrant  
22 anatomy to optimize model performance but further efforts will need to incorporate anatomic

1 variation. Model performance was suboptimal in visceral segment zones where significant  
2 variations exist with celiac, superior mesenteric, and renal artery takeoffs. With exposure to  
3 additional imaging and anatomic variation of the visceral and renal vessels, the performance in  
4 zones 6 through 8 is expected to improve. The sample also had a considerable number of patients  
5 with an only three-month interval between baseline and surveillance CT. This limited our ability  
6 to analyze long-term growth in many patients, and as a result, our sample may have been biased  
7 towards patients that experienced early rapid aortic growth. Additionally, there is not a standard  
8 definition of aortic growth in the literature, which limits our ability to compare growth patterns  
9 and characteristics between work from other similar studies. Our model also did not consider  
10 dissection flap morphology or false lumen volume. The next model iteration will add these  
11 components to the existing zone segmentation to better understand their contributory role, if any,  
12 towards aortic growth over time and allow for a more comprehensive set of applications with the  
13 existing model framework.

#### 14 **Conclusions:**

15 This is the first description of an automatic deep learning aortic segmentation model  
16 incorporating SVS-defined aortic zones and trained using a real-world dataset of patients with  
17 uncomplicated Type B aortic dissection. The open-source, trained model demonstrates high  
18 concordance to manually segmented “ground truth” aorta with particularly strong performance in  
19 zones 4, 5, and 9. Volumetric enlargement was most pronounced in Zones 4 and 5. The model  
20 framework offers potential to rapidly obtain volumetric and diameter measurements that may  
21 allow for a robust and granular understanding of aortic behavior. In our limited sample, there did  
22 not appear to be differences in baseline aortic zone volumes between patients with and without  
23 aortic enlargement.

## 1 **Author Contributions:**

2 Conception and design: JK, BF, WS, MC. Data collection: JK, BF, CV, BB, GS. Statistical  
3 analysis and interpretation: JK, BF, MC, MI. Writing the article: JK, MI. Critical revisions: BF,  
4 MC, GRU. Final approval: JK, MI, BF, CV, BB, GS, EH, GRU, WS, MC

## 5 **Disclosures:**

6 The authors have nothing to disclose.

## 7 **References**

- 8 1. Tsai TT, Fattori R, Trimarchi S, et al. Long-term survival in patients presenting with type B acute  
9 aortic dissection: insights from the International Registry of Acute Aortic Dissection. *Circulation*.  
10 2006;114(21):2226-2231. doi:10.1161/CIRCULATIONAHA.106.622340
- 11 2. Schwartz SI, Durham C, Clouse WD, et al. Predictors of late aortic intervention in patients with  
12 medically treated type B aortic dissection. *J Vasc Surg*. 2018;67(1):78-84.  
13 doi:10.1016/j.jvs.2017.05.128
- 14 3. Nienaber CA, Kische S, Rousseau H, et al. Endovascular repair of type B aortic dissection: Long-  
15 term results of the randomized investigation of stent grafts in aortic dissection trial. *Circ*  
16 *Cardiovasc Interv*. 2013;6(4):407-416. doi:10.1161/CIRCINTERVENTIONS.113.000463
- 17 4. Fattori R, Montgomery D, Lovato L, et al. Survival After Endovascular Therapy in Patients With  
18 Type B Aortic Dissection: A Report From the International Registry of Acute Aortic Dissection  
19 (IRAD). *JACC Cardiovasc Interv*. 2013;6(8):876-882.  
20 doi:<https://doi.org/10.1016/j.jcin.2013.05.003>
- 21 5. van Bogerijen GHW, Tolenaar JL, Rampoldi V, et al. Predictors of aortic growth in uncomplicated  
22 type B aortic dissection. *J Vasc Surg*. 2014;59(4):1134-1143. doi:10.1016/j.jvs.2014.01.042
- 23 6. Winnerkvist A, Lockowandt U, Rasmussen E, Rådegran K. A prospective study of medically  
24 treated acute type B aortic dissection. *Eur J Vasc Endovasc Surg*. 2006;32(4):349-355.  
25 doi:10.1016/j.ejvs.2006.04.004
- 26 7. Durham CA, Aranson NJ, Ergul EA, et al. Aneurysmal degeneration of the thoracoabdominal aorta  
27 after medical management of type B aortic dissections. *J Vasc Surg*. 2015;62(4):900-906.  
28 doi:10.1016/j.jvs.2015.04.423
- 29 8. Song JM, Kim SD, Kim JH, et al. Long-term predictors of descending aorta aneurysmal change in  
30 patients with aortic dissection. *J Am Coll Cardiol*. 2007;50(8):799-804.  
31 doi:10.1016/j.jacc.2007.03.064



- 1 9. Lombardi J V, Hughes GC, Appoo JJ, et al. Society for Vascular Surgery (SVS) and Society of  
2 Thoracic Surgeons (STS) reporting standards for type B aortic dissections. *J Vasc Surg.*  
3 2020;71(3):723-747. doi:10.1016/j.jvs.2019.11.013
- 4 10. Mora CE, Marcus CD, Barbe CM, Ecarnot FB, Long AL. Maximum Diameter of Native  
5 Abdominal Aortic Aneurysm Measured by Angio-Computed Tomography: Reproducibility and  
6 Lack of Consensus Impacts on Clinical Decisions. *Aorta (Stamford).* 2015;3(2):47-55.  
7 doi:10.12945/j.aorta.2015.14-059
- 8 11. Lindquist Liljeqvist M, Hultgren R, Gasser TC, Roy J. Volume growth of abdominal aortic  
9 aneurysms correlates with baseline volume and increasing finite element analysis-derived rupture  
10 risk. *J Vasc Surg.* 2016;63(6):1434-1442.e3. doi:10.1016/j.jvs.2015.11.051
- 11 12. Caradu C, Pouncey AL, Lakhlifi E, Brunet C, Bérard X, Ducasse E. Fully automatic volume  
12 segmentation using deep learning approaches to assess aneurysmal sac evolution after infrarenal  
13 endovascular aortic repair. *J Vasc Surg.* 2022;76(3):620-630.e3. doi:10.1016/j.jvs.2022.03.891
- 14 13. Wang L. Deep Learning Techniques to Diagnose Lung Cancer. *Cancers (Basel).* 2022;14(22).  
15 doi:10.3390/cancers14225569
- 16 14. Samala RK, Chan HP, Hadjiiski LM, Helvie MA, Cha KH, Richter CD. Multi-task transfer  
17 learning deep convolutional neural network: application to computer-aided diagnosis of breast  
18 cancer on mammograms. *Phys Med Biol.* 2017;62(23):8894-8908. doi:10.1088/1361-6560/aa93d4
- 19 15. Kyono T, Gilbert FJ, van der Schaar M. Improving Workflow Efficiency for Mammography Using  
20 Machine Learning. *J Am Coll Radiol.* 2020;17(1 Pt A):56-63. doi:10.1016/j.jacr.2019.05.012
- 21 16. Chan HP, Samala RK, Hadjiiski LM, Zhou C. Deep Learning in Medical Image Analysis. *Adv Exp*  
22 *Med Biol.* 2020;1213:3-21. doi:10.1007/978-3-030-33128-3\_1
- 23 17. Lyu T, Yang G, Zhao X, et al. Dissected aorta segmentation using convolutional neural networks.  
24 *Comput Methods Programs Biomed.* 2021;211:106417. doi:10.1016/j.cmpb.2021.106417
- 25 18. Consortium TM. Project MONAI. Published online December 2020. doi:10.5281/zenodo.4323059
- 26 19. Kikinis Ron and Pieper SD and VKG. 3D Slicer: A Platform for Subject-Specific Image Analysis,  
27 Visualization, and Clinical Support. In: Jolesz FA, ed. *Intraoperative Imaging and Image-Guided*  
28 *Therapy.* Springer New York; 2014:277-289. doi:10.1007/978-1-4614-7657-3\_19
- 29 20. Imran M, Krebs JR, Gopu VRR, et al. CIS-UNet: Multi-Class Segmentation of the Aorta in  
30 Computed Tomography Angiography via Context-Aware Shifted Window Self-Attention.  
31 Published online January 23, 2024.
- 32 21. Oderich GS, Ricotta JJ. Modified fenestrated stent grafts: device design, modifications,  
33 implantation, and current applications. *Perspect Vasc Surg Endovasc Ther.* 2009;21(3):157-167.  
34 doi:10.1177/1531003509351594
- 35 22. Feiger B, Lorenzana-Saldivar E, Horstmeyer R, et al. Context Aware Convolutional Neural  
36 Networks for Segmentation of Aortic Dissection. In: ; 2020.  
37 <https://api.semanticscholar.org/CorpusID:212409101>

- 1 23. Harris RJ, Kim S, Lohr J, et al. Classification of Aortic Dissection and Rupture on Post-contrast  
2 CT Images Using a Convolutional Neural Network. *J Digit Imaging*. 2019;32(6):939-946.  
3 doi:10.1007/s10278-019-00281-5
- 4 24. Yu Y, Gao Y, Wei J, et al. A Three-Dimensional Deep Convolutional Neural Network for  
5 Automatic Segmentation and Diameter Measurement of Type B Aortic Dissection. *Korean J*  
6 *Radiol*. 2021;22(2):168-178. doi:10.3348/kjr.2020.0313
- 7 25. Podgorsak AR, Bhurwani MMS, Rava RA, Chandra AR, Ionita CN. Use of a convolutional neural  
8 network for aneurysm identification in digital subtraction angiography. In: *Medical Imaging*. ;  
9 2019. <https://api.semanticscholar.org/CorpusID:88491049>
- 10 26. Dziubich T, Białas P, Znaniński Ł, Halman J, Brzeziński J. Abdominal Aortic Aneurysm  
11 Segmentation from Contrast-Enhanced Computed Tomography Angiography Using Deep  
12 Convolutional Networks. In: Bellatreche L, Bieliková M, Boussaïd O, et al., eds. *ADBIS, TPDFL*  
13 *and EDA 2020 Common Workshops and Doctoral Consortium*. Springer International Publishing;  
14 2020:158-168.
- 15 27. Camara JR, Tomihama RT, Pop A, et al. Development of a convolutional neural network to detect  
16 abdominal aortic aneurysms. *J Vasc Surg Cases Innov Tech*. 2022;8(2):305-311.  
17 doi:10.1016/j.jvscit.2022.04.003
- 18 28. Blakeslee-Carter J, Pearce BJ, Sutzko DC, Spangler E, Passman M, Beck AW. Progressive aortic  
19 enlargement in medically managed acute type B aortic dissections with visceral aortic  
20 involvement. *J Vasc Surg*. 2022;76(6):1466-1476.e1. doi:10.1016/j.jvs.2022.08.004
- 21 29. DEBAKEY ME, HENLY WS, COOLEY DA, MORRIS GC, CRAWFORD ES, BEALL AC.  
22 SURGICAL MANAGEMENT OF DISSECTING ANEURYSMS OF THE AORTA. *J Thorac*  
23 *Cardiovasc Surg*. 1965;49:130-149.
- 24 30. Daily PO, Trueblood HW, Stinson EB, Wuerflein RD, Shumway NE. Management of acute aortic  
25 dissections. *Ann Thorac Surg*. 1970;10(3):237-247.
- 26 31. Lee R, Jarchi D, Perera R, et al. Applied Machine Learning for the Prediction of Growth of  
27 Abdominal Aortic Aneurysm in Humans. *EJVES Short Rep*. 2018;39:24-28.  
28 doi:10.1016/j.ejvssr.2018.03.004
- 29 32. Summers KL, Kerut EK, To F, Sheahan CM, Sheahan MG. Machine learning-based prediction of  
30 abdominal aortic aneurysms for individualized patient care. *J Vasc Surg*. Published online January  
31 5, 2024. doi:10.1016/j.jvs.2023.12.046
- 32 33. Raffort J, Adam C, Carrier M, et al. Artificial intelligence in abdominal aortic aneurysm. *J Vasc*  
33 *Surg*. 2020;72(1):321-333.e1. doi:10.1016/j.jvs.2019.12.026
- 34 34. Wise ES, Hocking KM, Brophy CM. Prediction of in-hospital mortality after ruptured abdominal  
35 aortic aneurysm repair using an artificial neural network. *J Vasc Surg*. 2015;62(1):8-15.  
36 doi:10.1016/j.jvs.2015.02.038

37

38

## 1 **Figure Legends**

2 **Figure 1:** SVS/STS defined aortic zones in relation to primary aortic branches. Zone 0: aortic  
3 root to innominate artery. Zone 1: innominate artery to left common carotid artery. Zone 2: left  
4 common carotid to left subclavian artery. Zone 3: first 2cm distal to the left subclavian artery.  
5 Zone 4: Zone 3 to T6 vertebral body. Zone 5: Zone 4 to celiac artery. Zone 6: celiac artery to  
6 superior mesenteric artery. Zone 7: superior mesenteric artery to most proximal renal artery.  
7 Zone 8: renal to infra-renal abdominal aorta. Zone 9: Infrarenal abdominal aorta. Zone 10:  
8 common iliac arteries. Zone 11: external iliac arteries.

9 **Figure 2:** CIS-Unet: a hybrid model used for multi-class segmentation of the aorta that combines  
10 convolutional neural networks and vision transformers to capture both local and global image  
11 features to enhance segmentation accuracy.

12 **Figure 3:** Patient selection flowchart.

13 **Figure 4:** Changes in aortic zone volumes 3-10 between baseline (left ) and surveillance (right)  
14 imaging in two representative patients with variable growth patterns. The deep learning model  
15 captured volumetric changes in aortic zones over time with zones 4 and 5 experiencing the  
16 largest relative increases in volume.

17 **Figure 5:** Waterfall plots demonstrating changes in percent volume increase over time by  
18 patient. Each bar corresponds to an individual patient, with y-axis representing percentage  
19 growth over time. Zones 3,4, and 5 had the largest relative increases in zone volume, while zones  
20 6,7, and 8 were more variable. Patients in blue experienced rapid growth, while those in orange  
21 had no/slow growth.

22 **Table Legends:**

23 Table I: Patient demographics, comorbidities, aortic growth (mm/year), and TEVAR incidence  
24 during surveillance duration.

25 Table II: Imaging characteristics from initial CTA obtained at index admission.

26 Table III: Aortic growth over time by group defined as % dilation ( $((\text{surveillance aortic volume} -$   
27  $\text{initial aortic volume})/\text{initial aortic volume}) * 100$ ).

28 Table IV: Baseline aortic zone volumes in voxels<sup>3</sup> by group.

29 Table V: Dice coefficient by zone.

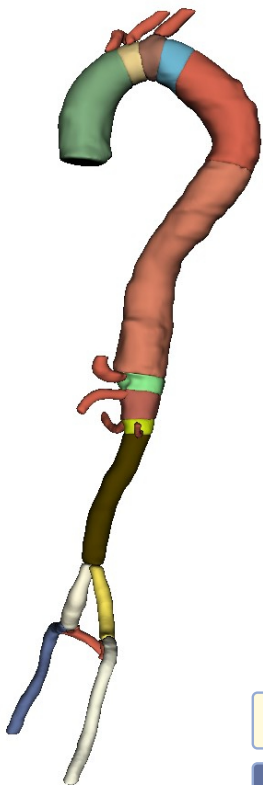

**Zone 0**

**Zone 1**

**Zone 2**

**Zone 3**

**Zone 4**

**Zone 5**

**Zone 6**

**Zone 7**

**Zone 8**

**Zone 9**

**Zone 10R**

**Zone 10L**

**Zone 11R**

**Zone 11L**

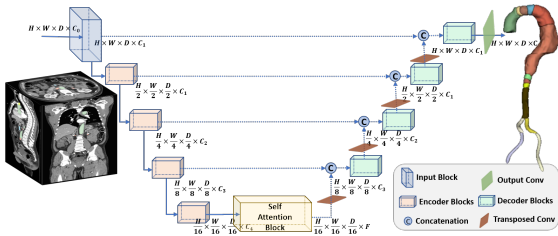

159 patients admitted for acute  
uncomplicated Type B Aortic  
Dissection (10/2011-3/2020)

83 patients with  
missing or inadequate  
serial imaging

76 patients with  
available serial imaging

17 with aberrant aortic  
arch anatomy

59 uTBAD patients

**A. % Volume increase by zone in representative patient with diameter increase  $\geq 5\text{mm}/\text{year}$**

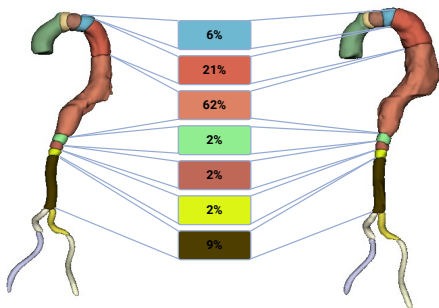

**B. % Volume increase by zone in representative patient with diameter increase  $< 5\text{mm}/\text{year}$**

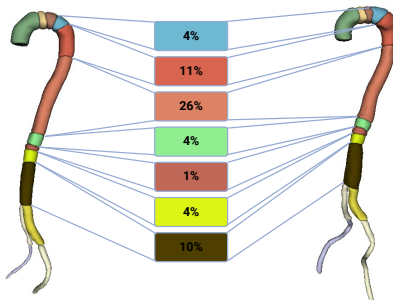



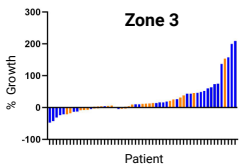

■ Rapid Aortic Growth  
■ Slow/No Aortic Growth

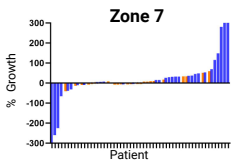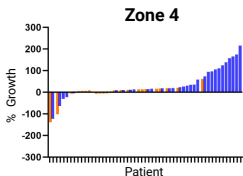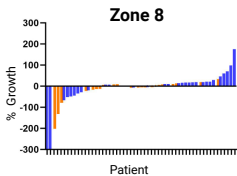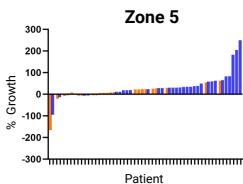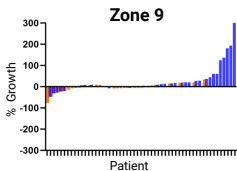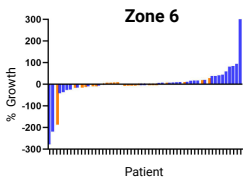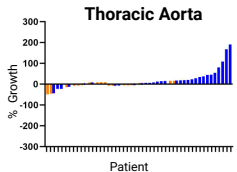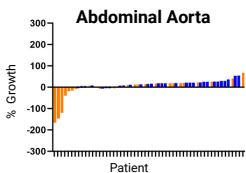

**Table I: Patient Characteristics**

|                                                  | All Patients<br>(n=59) | Rapid Aortic<br>Growth<br>(n=33) | No/Slow Aortic<br>Growth<br>(n=26) | p-value         |
|--------------------------------------------------|------------------------|----------------------------------|------------------------------------|-----------------|
| <b>General Characteristics</b>                   |                        |                                  |                                    |                 |
|                                                  | <b>Mean (SD)</b>       | <b>Mean (SD)</b>                 | <b>Mean (SD)</b>                   |                 |
| Index admission age (years)                      | 59.2 (14.6)            | 57.7 (15.4)                      | 61.2 (13.7)                        | 0.35            |
| Body Mass Index                                  | 30.7 (6.7)             | 30.9 (5.1)                       | 30.5 (8.3)                         | 0.81            |
| Mean arterial pressure on initial presentation   | 95.5 (28.4)            | 101 (30)                         | 89 (25)                            | 0.10            |
| Number of discharge antihypertensive medications | 3 (1.1)                | 3.0 (1.1)                        | 3.0 (1.3)                          | 0.83            |
| Surveillance duration (years)                    | 1.7 (1.9)              | 0.94 (1.0)                       | 2.76 (2.2)                         | <b>&lt;0.01</b> |
|                                                  | <b>N (%)</b>           | <b>N (%)</b>                     | <b>N (%)</b>                       |                 |
| Sex                                              |                        |                                  |                                    |                 |
| Male                                             | 39 (66)                | 21 (64)                          | 18 (69)                            | 0.78            |
| Female                                           | 20 (34)                | 12 (36)                          | 8 (31)                             |                 |
| Race                                             |                        |                                  |                                    | 0.76            |
| Black                                            | 14 (24)                | 7 (21)                           | 7 (27)                             |                 |
| White                                            | 41 (69)                | 24 (73)                          | 17 (65)                            |                 |
| Hispanic                                         | 3 (5)                  | 1 (3)                            | 2 (8)                              |                 |
| Asian                                            | 0                      | 0 (0)                            | 0 (0)                              |                 |
| Other/not specified                              | 1 (2)                  | 1 (3)                            | 0 (0)                              |                 |
| Hypertension                                     | 48 (81)                | 26 (79)                          | 22 (85)                            | 0.74            |
| Coronary artery disease                          | 5 (8)                  | 3 (9)                            | 2 (8)                              | 1               |
| CVA                                              | 2 (3)                  | 2 (6)                            | 0 (0)                              | 0.50            |
| Chronic obstructive pulmonary disease            | 6 (10)                 | 3 (9)                            | 3 (12)                             | 1               |
| Diabetes                                         | 3 (5)                  | 2 (6)                            | 1 (4)                              | 1               |
| Renal disease                                    | 8 (14)                 | 6 (18)                           | 2 (8)                              | 0.12            |
| Tobacco use (ever)                               | 40 (68)                | 21 (64)                          | 19 (73)                            | 0.58            |
| Cocaine/amphetamine use                          | 4 (7)                  | 2 (6)                            | 2 (8)                              | 1               |
|                                                  | <b>Median (Q1, Q3)</b> | <b>Median (Q1,Q3)</b>            | <b>Median (Q1, Q3)</b>             |                 |
| Thoracic diameter increase (mm/year)             | 4.9 (1.6,13.1)         | 11.0 (5.8,20.9)                  | 1.7 (0.1, 3.8)                     | <b>&lt;0.01</b> |
| Abdominal diameter increase (mm/year)            | 2.8 (0.7,5.6)          | 3 (1.0, 7.0)                     | 1.3 (0.5,2.4)                      | <b>&lt;0.01</b> |
|                                                  | <b>N (%)</b>           | <b>N (%)</b>                     | <b>N (%)</b>                       |                 |
| TEVAR during surveillance period                 | 13 (22)                | 7 (21)                           | 6 (23)                             | 1.0             |

**Table II: Baseline Imaging Characteristics**

|                                        | <b>All Patients<br/>(n=59)</b> | <b>Rapid Aortic<br/>Growth<br/>(n=33)</b> | <b>No/Slow Aortic<br/>Growth<br/>(n=26)</b> | <b>p-value</b> |
|----------------------------------------|--------------------------------|-------------------------------------------|---------------------------------------------|----------------|
| <b>Baseline CT Characteristics</b>     |                                |                                           |                                             |                |
|                                        | <b>Mean (SD)</b>               | <b>Mean (SD)</b>                          | <b>Mean (SD)</b>                            |                |
| Maximum Thoracic Aortic Diameter (mm)  | 42.0 (7.0)                     | 40.3 (5.0)                                | 44.3 (8.5)                                  | <b>0.03</b>    |
| Maximum Abdominal Aortic Diameter (mm) | 32.9 (5.0)                     | 31.7 (4.1)                                | 34.3 (5.7)                                  | <b>0.05</b>    |
|                                        | <b>N (%)</b>                   | <b>N (%)</b>                              | <b>N (%)</b>                                |                |
| False Lumen Status                     |                                |                                           |                                             |                |
| Thrombosed                             | 5 (8.5)                        | 1 (3.0)                                   | 4 (15)                                      |                |
| Partially Thrombosed                   | 27 (46)                        | 18 (55)                                   | 9 (35)                                      |                |
| Patent                                 | 27 (46)                        | 14 (42)                                   | 13 (50)                                     | 0.13           |
| Lesser curve entry tear                | 3 (5)                          | 2 (6)                                     | 1 (4)                                       | 1.0            |
| <b>Surveillance CT Characteristics</b> |                                |                                           |                                             |                |
|                                        | <b>Mean (SD)</b>               | <b>Mean (SD)</b>                          | <b>Mean (SD)</b>                            |                |
| Maximum Thoracic Aortic Diameter (mm)  | 48.8 (9.2)                     | 48.8 (8.8)                                | 48.8 (10.0)                                 | 1.0            |
| Maximum Abdominal Aortic Diameter (mm) | 38.7 (7.6)                     | 36.7 (6.7)                                | 38.7 (7.6)                                  | 0.27           |
|                                        | <b>N (%)</b>                   | <b>N (%)</b>                              | <b>N (%)</b>                                |                |
| False Lumen                            |                                |                                           |                                             |                |
| Thrombosed                             | 2                              | 0                                         | 2                                           |                |
| Partially Thrombosed                   | 28                             | 16                                        | 12                                          |                |
| Patent                                 | 29                             | 17                                        | 12                                          | 0.27           |

**Table III:** Percentage aortic growth by zone over surveillance period

|                                                              | <b>All Patients<br/>(n=59)</b> | <b>Rapid Aortic<br/>Growth<br/>(n=33)</b> | <b>No/Slow Aortic<br/>Growth<br/>(n=26)</b> | <b>p-value</b> |
|--------------------------------------------------------------|--------------------------------|-------------------------------------------|---------------------------------------------|----------------|
| <b>Aortic Growth Over Surveillance Duration (% dilation)</b> |                                |                                           |                                             |                |
|                                                              | <b>Median (Q1, Q3)</b>         | <b>Median (Q1,Q3)</b>                     | <b>Median (Q1,Q3)</b>                       |                |
| Zone 3 Growth                                                | 11 (-3.5,43)                   | 16 (-5.0,60)                              | 3.6 (-3.4,19)                               | 0.11           |
| Zone 4 Growth                                                | 13 (2.0,35)                    | 26 (11,106)                               | 4.1 (-2.2,13)                               | <0.01          |
| Zone 5 Growth                                                | 24 (4.4,37)                    | 32 (18,60)                                | 5.8 (0.69,24)                               | <0.01          |
| Zone 6 Growth                                                | 4.0 (-9.9,17)                  | 9.5 (-10,39)                              | 0.57 (-8.5,4.0)                             | 0.42           |
| Zone 7 Growth                                                | 4.3 (-4.3,34)                  | 27 (-9.5,49)                              | 2.8 (-3.6,9.7)                              | 0.55           |
| Zone 8 Growth                                                | 2.6 (-17,17)                   | 10 (-29,21)                               | 0.93 (-14,5.8)                              | 0.40           |
| Zone 9 Growth                                                | 4.5(-0.1,21)                   | 15 (-0.14,45)                             | 0.56 (-9.6,4.6)                             | 0.01           |
| Thoracic Aorta                                               | 15 (1.2,22)                    | 18 (4.2,26)                               | 11 (-14, 19)                                | 0.02           |
| Abdominal Aorta                                              | 5.3 (-1.1,19)                  | 15 (2.3,37)                               | -0.34 (-7.0,3.3)                            | 0.01           |

**Table IV:** Comparison of baseline aortic zone volumes by group.

|                                                          | All Patients<br>(n=59) | Rapid Aortic<br>Growth<br>(n=33) | No/Slow Aortic<br>Growth<br>(n=26) | p-value |
|----------------------------------------------------------|------------------------|----------------------------------|------------------------------------|---------|
| <b>Baseline Aortic Zone Volumes (voxels<sup>3</sup>)</b> |                        |                                  |                                    |         |
|                                                          | <b>Mean (SD)</b>       | <b>Mean (SD)</b>                 | <b>Mean (SD)</b>                   |         |
| Zone 3                                                   | 5.4 (1.7)              | 5.0 (1.8)                        | 6.0 (1.4)                          | 0.03    |
| Zone 4                                                   | 20.3 (7.4)             | 19.4 (7.0)                       | 21.4 (7.9)                         | 0.32    |
| Zone 5                                                   | 38.8 (17.1)            | 37.0 (12.9)                      | 41.2 (21.5)                        | 0.38    |
| Zone 6                                                   | 3.1 (1.7)              | 2.8 (0.9)                        | 3.6 (2.3)                          | 0.07    |
| Zone 7                                                   | 1.8 (0.9)              | 1.7 (1.1)                        | 1.8 (0.8)                          | 0.84    |
| Zone 8                                                   | 2.5 (1.5)              | 2.2 (1.1)                        | 2.8 (2.0)                          | 0.19    |
| Zone 9                                                   | 11.0 (3.9)             | 10.5 (3.7)                       | 11.6 (4.0)                         | 0.28    |
| Thoracic Aorta                                           | 64.5 (26.4)            | 57.7 (23.8)                      | 65.8 (29.1)                        | 0.25    |
| Abdominal Aorta                                          | 18.3 (8.1)             | 16.1 (7.0)                       | 19.0 (7.8)                         | 0.15    |

**Table V:** Dice coefficient by zone

| <b>Dice Coefficient by Zone</b> |                         |
|---------------------------------|-------------------------|
|                                 | <b>Dice Coefficient</b> |
| Zone 3                          | 0.54                    |
| Zone 4                          | 0.82                    |
| Zone 5                          | 0.88                    |
| Zone 6                          | 0.60                    |
| Zone 7                          | 0.65                    |
| Zone 8                          | 0.70                    |
| Zone 9                          | 0.91                    |
| Overall                         | 0.73                    |
